# Supplementary material
Source: PubMed Central journal article supplement (PMC3534863)
Supplement: NIHMS423741-supplement-03.pdf [file NIHMS423741-supplement-03.pdf]

a. WXT10 (TTC)<sub>20</sub>

ACGATGATAACAAACCGAAGTTATCTGATGTAGAAAAGGATTAAGATGCTAAGAGATAGTGATGATAT  
TTCATAAATAATGTAATTCATATATATGTTAATTACCTTTTTTTCGAGGCATATTTATGGTGAAGGATAA  
GTTTTGACTCGCCCGGGCGATCGCGAGGAGCTCGAGTGCAGACCTCAAATTCGATGAA (GAA)<sub>20</sub>  
GATCCAGCTTCTGCACGCGATCGCGGCGCGCCGATCCAAATGTTATTTCAACTATCAATGTTATGAGCT  
TAGCCGCCGTGCGCAAGCCAAAGTTCTTTGACTTTGTTTCTCCACTTCTACTCTTGACACTGAATACT  
ACTTTAATTTGTCAGATAA

b. WXT11 (TTC)<sub>230</sub>

ACGATGATAACAAACCGAAGTTATCTGATGTAGAAAAGGATTAAGATGCTAAGAGATAGTGATGATAT  
TTCATAAATAATGTAATTCATATATATGTTAATTACCTTTTTTTCGAGGCATATTTATGGTGAAGGATAA  
GTTTTGACTCGCCCGGGCGATCGCGAGGAGCTCGAGTGCAGACCTCAAATTCGTTGAA (GAA)<sub>230</sub>  
GATCAAGCTTCAGGTTCTGCACATCGCGCGCCGACCCAAATGTTATTTCAACTATCAATGTTATGAGCT  
TAGCCGCCGTGCGCAAGCCAAAGTTCTTTGACTTTGTTTCTCCACTTCTACTCTTGACACTGAATACT  
ACTTTAATTTGTCAGATAA

c. WXT12 (GAA)<sub>20</sub>

ACGATGATAACAAACCGAAGTTATCTGATGTAGAAAAGGATTAAGATGCTAAGAGATAGTGATGATAT  
TTCATAAATAATGTAATTCATATATATGTTAATTACCTTTTTTTCGAGGCATATTTATGGTGAAGGATAA  
GTTTTGACTCCATAATGGTGCCTTAGTTCACTGGGTTTATCCATATGCCAAATTGAGGGATCGGCCGCGC  
CGCATCGCGTGCAGAAGCTGGATC (TTC)<sub>20</sub> TTCATCGAATTTGAGGTCTGCACTCGAGCTCCTCGCG  
ATCGCCCGGGCGATCCAAATGTTATTTCAACTATCAATGTTATGAGCTTAGCCGCCGTGCGCAAGCCAA  
AGTTCTTTGACTTTGTTTCTCCACTTCTACTCTTGACACTGAATACTACTTTAATTTGTCAGATAA

d. WXT13 (GAA)<sub>230</sub>

ACGATGATAACAAACCGAAGTTATCTGATGTAGAAAAGGATTAAGATGCTAAGAGATAGTGATGATAT  
TTCATAAATAATGTAATTCATATATATGTTAATTACCTTTTTTTCGAGGCATATTTATGGTGAAGGATAA  
GTTTTGACTCCATAATGGTGCCTTAGTTCACTGGGTTTATCCATATGCCAAATTGAGGGATCGGCCGCGC  
CGCATCGCGTGCAGAAGCTTGATC (TTC)<sub>230</sub> TTCATCGAATTTGAGGTCTGCACTCGAGCTCCTCGC  
GATCGCCCGGGCGATCCAAATGTTATTTCAACTATCAATGTTATGAGCTTAGCCGCCGTGCGCAAGCCAA  
AAGTTCTTTGACTTTGTTTCTCCACTTCTACTCTTGACACTGAATACTACTTTAATTTGTCAGATAA
