# Supplementary material
Source: PubMed Central journal article supplement (PMC3534863)

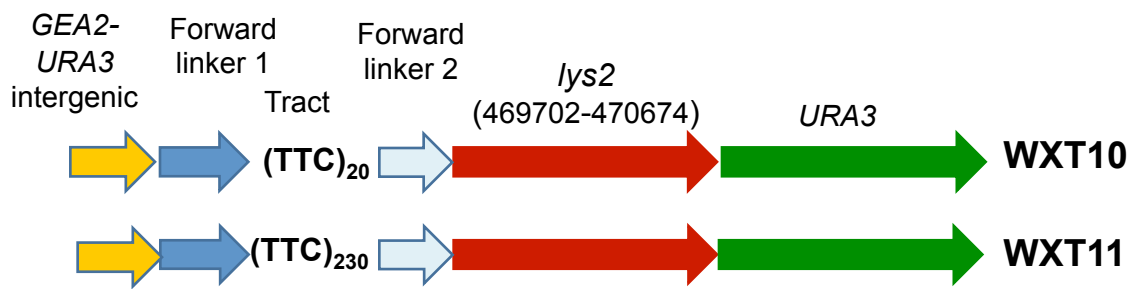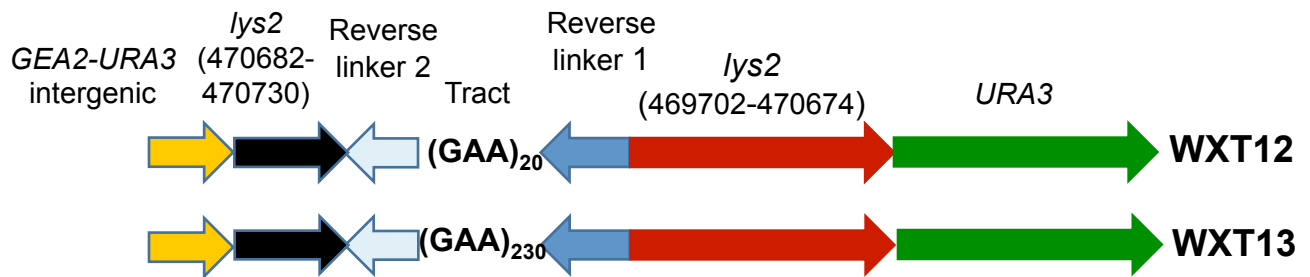

Supplement: NIHMS423741-supplement-02.pdf [file NIHMS423741-supplement-02.pdf]
